# Supplementary material
Source: publisher figshare collection journal article supplement (https://asha.figshare.com/articles/dataset/_/11594853)
Supplement: Supplementary file 1 [file 1]

**Supplemental Material S4.** Results of two-tailed paired-sample *t*-tests comparing the magnitude of fall for T4 vs. T6.

| Age band | Magnitude of fall |          |                | H1*-H2*   |          |                |
|----------|-------------------|----------|----------------|-----------|----------|----------------|
|          | <i>df</i>         | <i>t</i> | <i>p</i> value | <i>df</i> | <i>t</i> | <i>p</i> value |
| 2;1-2;6  | 18                | 5.490    | < .001         | 17        | 0.393    | .699           |
| 2;7-3;0  | 19                | 4.641    | < .001         | 19        | -0.756   | .459           |
| 3;1-3;6  | 19                | 7.736    | < .001         | 19        | -0.483   | .635           |
| 3;7-4;0  | 18                | 10.097   | < .001         | 17        | 0.346    | .733           |
| 4;1-4;6  | 19                | 6.554    | < .001         | 18        | 1.243    | .230           |
| 4;7-5;0  | 18                | 8.139    | < .001         | 18        | 1.484    | .155           |
| 5;1-5;6  | 19                | 6.936    | < .001         | 19        | -1.415   | .173           |
| 5;7-6;0  | 18                | 7.524    | < .001         | 18        | 1.089    | .291           |
| Ref      | 9                 | 3.520    | .007           | 9         | -0.609   | .558           |
