# Supplementary material
Source: publisher figshare collection journal article supplement (https://asha.figshare.com/articles/dataset/_/11594853)
Supplement: Supplementary file 2 [file 1]

**Supplemental Material S3.** Results of two-tailed paired-sample *t*-tests comparing T2 vs. T5 for the magnitude of rise (left columns) and post hoc pairwise comparisons with Tukey correction for the position of the inflection point (right columns).

| Age band | Magnitude of rise |          |                | Inflection point |          |                |
|----------|-------------------|----------|----------------|------------------|----------|----------------|
|          | <i>df</i>         | <i>t</i> | <i>p</i> value | <i>df</i>        | <i>t</i> | <i>p</i> value |
| 2;1-2;6  | 14                | 5.968    | < .001         | 2467             | 1.692    | .091           |
| 2;7-3;0  | 17                | 4.815    | < .001         | 2467             | 2.302    | .021           |
| 3;1-3;6  | 19                | 3.977    | < .001         | 2467             | -0.243   | .808           |
| 3;7-4;0  | 19                | 6.913    | < .001         | 2467             | -1.682   | .093           |
| 4;1-4;6  | 17                | 6.192    | < .001         | 2467             | -1.913   | .056           |
| 4;7-5;0  | 19                | 7.493    | < .001         | 2467             | 0.622    | .534           |
| 5;1-5;6  | 18                | 6.337    | < .001         | 2467             | -0.924   | .356           |
| 5;7-6;0  | 19                | 6.657    | < .001         | 2467             | -2.813   | .005           |
| Ref      | 9                 | 7.251    | < .001         | 2467             | -3.848   | < .001         |
