# Supplementary material
Source: publisher figshare collection journal article supplement (https://asha.figshare.com/articles/dataset/_/11594853)
Supplement: Supplementary file 3 [file 1]

**Supplemental Material S5.** Results of Tukey’s HSD post hoc tests comparing the HNR between age groups.

| <b>Comparison</b> | <b>Adjusted <i>p</i></b> |
|-------------------|--------------------------|
| 2;7-3;0 – 2;1-2;6 | 1.000                    |
| 3;1-3;6 – 2;1-2;6 | 1.000                    |
| 3;7-4;0 – 2;1-2;6 | 1.000                    |
| 4;1-4;6 – 2;1-2;6 | .994                     |
| 4;7-5;0 – 2;1-2;6 | .978                     |
| 5;1-5;6 – 2;1-2;6 | .995                     |
| 5;7-6;0 – 2;1-2;6 | 1.000                    |
| Ref – 2;1-2;6     | < .001                   |
| <hr/>             |                          |
| 3;1-3;6 – 2;7-3;0 | 1.000                    |
| 3;7-4;0 – 2;7-3;0 | 1.000                    |
| 4;1-4;6 – 2;7-3;0 | 1.000                    |
| 4;7-5;0 – 2;7-3;0 | .999                     |
| 5;1-5;6 – 2;7-3;0 | 1.000                    |
| 5;7-6;0 – 2;7-3;0 | 1.000                    |
| Ref – 2;7-3;0     | < .001                   |
| <hr/>             |                          |
| 3;7-4;0 – 3;1-3;6 | 1.000                    |
| 4;1-4;6 – 3;1-3;6 | .995                     |
| 4;7-5;0 – 3;1-3;6 | .982                     |
| 5;1-5;6 – 3;1-3;6 | .996                     |
| 5;7-6;0 – 3;1-3;6 | 1.000                    |
| Ref – 3;1-3;6     | < .001                   |
| <hr/>             |                          |
| 4;1-4;6 – 3;7-4;0 | 1.000                    |
| 4;7-5;0 – 3;7-4;0 | 1.000                    |
| 5;1-5;6 – 3;7-4;0 | 1.000                    |
| 5;7-6;0 – 3;7-4;0 | .999                     |
| Ref – 3;7-4;0     | < .001                   |
| <hr/>             |                          |
| 4;7-5;0 – 4;1-4;6 | 1.000                    |
| 5;1-5;6 – 4;1-4;6 | 1.000                    |
| 5;7-6;0 – 4;1-4;6 | .991                     |
| Ref – 4;1-4;6     | < .001                   |
| <hr/>             |                          |
| 5;1-5;6 – 4;7-5;0 | 1.000                    |
| 5;7-6;0 – 4;7-5;0 | .971                     |
| Ref – 4;7-5;0     | < .001                   |
| <hr/>             |                          |
| 5;7-6;0 – 5;1-5;6 | .993                     |
| Ref – 5;1-5;6     | < .001                   |
| Ref – 5;7-6;0     | < .001                   |
