# Supplementary material
Source: publisher figshare collection journal article supplement (https://asha.figshare.com/articles/dataset/_/11594853)
Supplement: Supplementary file 4 [file 1]

**Supplemental Material S2.** Pairwise comparisons using Tukey (HSD) tests for tonal dispersion (middle column) and phonological pitch range (right column).

| Age bands         | Tonal dispersion<br>Adjusted <i>p</i> | Phonological pitch range<br>Adjusted <i>p</i> |
|-------------------|---------------------------------------|-----------------------------------------------|
| 2;7-3;0 – 2;1-2;6 | .698                                  | .813                                          |
| 3;1-3;6 – 2;1-2;6 | .998                                  | .905                                          |
| 3;7-4;0 – 2;1-2;6 | 1.000                                 | .718                                          |
| 4;1-4;6 – 2;1-2;6 | 1.000                                 | .484                                          |
| 4;7-5;0 – 2;1-2;6 | 1.000                                 | 1.000                                         |
| 5;1-5;6 – 2;1-2;6 | .993                                  | .484                                          |
| 5;7-6;0 – 2;1-2;6 | .422                                  | .033                                          |
| Ref – 2;1-2;6     | .811                                  | .435                                          |
| <hr/>             |                                       |                                               |
| 3;1-3;6 – 2;7-3;0 | .981                                  | 1.000                                         |
| 3;7-4;0 – 2;7-3;0 | .322                                  | 1.000                                         |
| 4;1-4;6 – 2;7-3;0 | .575                                  | 1.000                                         |
| 4;7-5;0 – 2;7-3;0 | .486                                  | .960                                          |
| 5;1-5;6 – 2;7-3;0 | .152                                  | 1.000                                         |
| 5;7-6;0 – 2;7-3;0 | .003                                  | .728                                          |
| Ref – 2;7-3;0     | .062                                  | .994                                          |
| <hr/>             |                                       |                                               |
| 3;7-4;0 – 3;1-3;6 | .930                                  | 1.000                                         |
| 4;1-4;6 – 3;1-3;6 | .992                                  | .998                                          |
| 4;7-5;0 – 3;1-3;6 | .981                                  | .988                                          |
| 5;1-5;6 – 3;1-3;6 | .766                                  | .998                                          |
| 5;7-6;0 – 3;1-3;6 | .081                                  | .588                                          |
| Ref – 3;1-3;6     | .400                                  | .981                                          |
| <hr/>             |                                       |                                               |
| 4;1-4;6 – 3;7-4;0 | 1.000                                 | 1.000                                         |
| 4;7-5;0 – 3;7-4;0 | 1.000                                 | .917                                          |
| 5;1-5;6 – 3;7-4;0 | 1.000                                 | 1.000                                         |
| 5;7-6;0 – 3;7-4;0 | .767                                  | .822                                          |
| Ref – 3;7-4;0     | .965                                  | .998                                          |
| <hr/>             |                                       |                                               |
| 4;7-5;0 – 4;1-4;6 | 1.000                                 | .751                                          |
| 5;1-5;6 – 4;1-4;6 | .998                                  | 1.000                                         |
| 5;7-6;0 – 4;1-4;6 | .510                                  | .952                                          |
| Ref – 4;1-4;6     | .868                                  | 1.000                                         |
| <hr/>             |                                       |                                               |
| 5;1-5;6 – 4;7-5;0 | .999                                  | .751                                          |
| 5;7-6;0 – 4;7-5;0 | .599                                  | .095                                          |
| Ref – 4;7-5;0     | .909                                  | .659                                          |
| <hr/>             |                                       |                                               |
| 5;7-6;0 – 5;1-5;6 | .930                                  | .952                                          |
| Ref – 5;1-5;6     | .995                                  | 1.000                                         |
| Ref – 5;7-6;0     | 1.000                                 | 1.000                                         |
