# Supplementary material
Source: publisher figshare collection journal article supplement (https://asha.figshare.com/articles/dataset/_/11594853)
Supplement: Supplementary file 5 [file 1]

**Supplemental Material S1.** Accuracy of top-, mid-, and bottom-ranking children of each age group, and one-sample *t*-test results.

| <b>Ranking</b> | <b>Age band</b> | <b><i>M</i></b> | <b><i>SE</i></b> | <b>Estimate</b> | <b><i>df</i></b> | <b><i>t</i> value</b> | <b><i>p</i> value</b> |
|----------------|-----------------|-----------------|------------------|-----------------|------------------|-----------------------|-----------------------|
| Top            | 2;1-2;6         | 0.720           | 0.017            | 0.720           | 6                | 32.466                | < .0001               |
| Top            | 2;7-3;0         | 0.886           | 0.014            | 0.886           | 6                | 49.756                | < .0001               |
| Top            | 3;1-3;6         | 0.805           | 0.022            | 0.805           | 7                | 29.289                | < .0001               |
| Top            | 3;7-4;0         | 0.727           | 0.017            | 0.727           | 6                | 33.237                | < .0001               |
| Top            | 4;1-4;6         | 0.870           | 0.018            | 0.870           | 6                | 39.086                | < .0001               |
| Top            | 4;7-5;0         | 0.854           | 0.005            | 0.854           | 6                | 130.201               | < .0001               |
| Top            | 5;1-5;6         | 0.934           | 0.014            | 0.934           | 6                | 53.117                | < .0001               |
| Top            | 5;7-6;0         | 0.966           | 0.004            | 0.966           | 8                | 193.900               | < .0001               |
| Mid            | 2;1-2;6         | 0.613           | 0.018            | 0.613           | 5                | 24.303                | < .0001               |
| Mid            | 2;7-3;0         | 0.797           | 0.010            | 0.797           | 5                | 61.645                | < .0001               |
| Mid            | 3;1-3;6         | 0.716           | 0.004            | 0.716           | 4                | 137.333               | < .0001               |
| Mid            | 3;7-4;0         | 0.650           | 0.012            | 0.650           | 3                | 41.858                | < .0001               |
| Mid            | 4;1-4;6         | 0.752           | 0.008            | 0.752           | 5                | 70.200                | < .0001               |
| Mid            | 4;7-5;0         | 0.807           | 0.007            | 0.807           | 5                | 96.000                | < .0001               |
| Mid            | 5;1-5;6         | 0.848           | 0.012            | 0.848           | 5                | 58.429                | < .0001               |
| Mid            | 5;7-6;0         | 0.925           | 0.003            | 0.925           | 3                | 262.694               | < .0001               |
| Bottom         | 2;1-2;6         | 0.485           | 0.022            | 0.485           | 5                | 14.260                | < .0001               |
| Bottom         | 2;7-3;0         | 0.697           | 0.022            | 0.697           | 6                | 24.223                | < .0001               |
| Bottom         | 3;1-3;6         | 0.613           | 0.026            | 0.613           | 6                | 17.487                | < .0001               |
| Bottom         | 3;7-4;0         | 0.570           | 0.010            | 0.570           | 8                | 39.785                | < .0001               |
| Bottom         | 4;1-4;6         | 0.641           | 0.017            | 0.641           | 6                | 27.988                | < .0001               |
| Bottom         | 4;7-5;0         | 0.696           | 0.025            | 0.696           | 6                | 20.877                | < .0001               |
| Bottom         | 5;1-5;6         | 0.716           | 0.018            | 0.716           | 6                | 29.890                | < .0001               |
| Bottom         | 5;7-6;0         | 0.857           | 0.017            | 0.857           | 6                | 39.955                | < .0001               |
