# Supplementary material
Source: publisher figshare collection journal article supplement (https://asha.figshare.com/articles/dataset/_/11594853)
Supplement: Supplementary file 6 [file 1]

**Supplemental Material S6.** Post hoc pairwise comparisons using Fisher's Exact Test of Independence comparing creaky tokens among age groups.

| <b>Comparison</b> | <b><i>p</i>.Fisher</b> | <b><i>p</i>.adj.Fisher</b> |
|-------------------|------------------------|----------------------------|
| 2;1-2;6 : 2;7-3;0 | .369                   | .458                       |
| 2;1-2;6 : 3;1-3;6 | 1.000                  | 1.000                      |
| 2;1-2;6 : 3;7-4;0 | .368                   | .458                       |
| 2;1-2;6 : 4;1-4;6 | < .001                 | < .001                     |
| 2;1-2;6 : 4;7-5;0 | .013                   | .030                       |
| 2;1-2;6 : 5;1-5;6 | .236                   | .341                       |
| 2;1-2;6 : 5;7-6;0 | .098                   | .185                       |
| 2;1-2;6 : Ref     | < .001                 | < .001                     |
| 2;7-3;0 : 3;1-3;6 | .237                   | .341                       |
| 2;7-3;0 : 3;7-4;0 | 1.000                  | 1.000                      |
| 2;7-3;0 : 4;1-4;6 | .001                   | .004                       |
| 2;7-3;0 : 4;7-5;0 | .120                   | .206                       |
| 2;7-3;0 : 5;1-5;6 | 1.000                  | 1.000                      |
| 2;7-3;0 : 5;7-6;0 | .551                   | .640                       |
| 2;7-3;0 : Ref     | < .001                 | < .001                     |
| 3;1-3;6 : 3;7-4;0 | .305                   | .422                       |
| 3;1-3;6 : 4;1-4;6 | < .001                 | < .001                     |
| 3;1-3;6 : 4;7-5;0 | .003                   | .009                       |
| 3;1-3;6 : 5;1-5;6 | .153                   | .239                       |
| 3;1-3;6 : 5;7-6;0 | .044                   | .093                       |
| 3;1-3;6 : Ref     | < .001                 | < .001                     |
| 3;7-4;0 : 4;1-4;6 | .001                   | .003                       |
| 3;7-4;0 : 4;7-5;0 | .088                   | .176                       |
| 3;7-4;0 : 5;1-5;6 | .878                   | .958                       |
| 3;7-4;0 : 5;7-6;0 | .453                   | .544                       |
| 3;7-4;0 : Ref     | < .001                 | < .001                     |
| 4;1-4;6 : 4;7-5;0 | .113                   | .203                       |
| 4;1-4;6 : 5;1-5;6 | .001                   | .004                       |
| 4;1-4;6 : 5;7-6;0 | .012                   | .030                       |
| 4;1-4;6 : Ref     | .019                   | .042                       |
| 4;7-5;0 : 5;1-5;6 | .136                   | .223                       |
| 4;7-5;0 : 5;7-6;0 | .351                   | .458                       |
| 4;7-5;0 : Ref     | < .001                 | .001                       |
| 5;1-5;6 : 5;7-6;0 | .570                   | .641                       |
| 5;1-5;6 : Ref     | < .001                 | < .001                     |
| 5;7-6;0 : Ref     | < .001                 | < .001                     |
